# Supplementary material for: The proteome of methylmalonic acidemia (MMA): the elucidation of altered pathways in patient livers
Source: Royal Society of Chemistry journal article supplement (doi:10.1039/c5mb00736d), 2015-11-26
Supplement: c5mb00736d2.pdf [file c5mb00736d2.pdf]

A

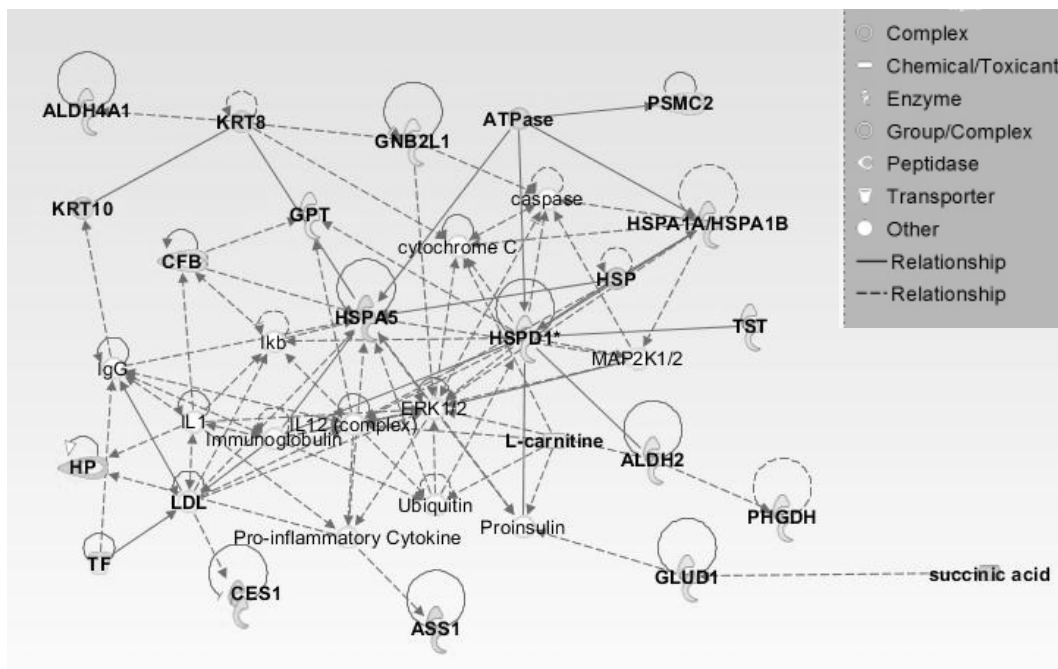

B

↑ALDH2, ↓ALDH4A1, ↓ASS1, ATPase, caspase, ↓CES1, ↓CFB, cytochrome C, ERK1/2, ↑GLUD1, ↑GNB2L1, ↑GPT, ↓HP, HSP, ↓HSPA5, ↓HSPA1A/HSPA1B, ↑HSPD1\*, IgG, Ikb, IL1, IL12 (complex), Immunoglobulin, ↓KRT8, ↓KRT10, ↑L-carnitine, LDL, MAP2K1/2, ↑PHGDH, Pro-inflammatory Cytokine, Proinsulin, ↓PSMC2, ↓succinic acid, ↑TF, ↓TST, Ubiquitin

Figure 2 Supplemental material
