# Supplementary material for: The proteome of methylmalonic acidemia (MMA): the elucidation of altered pathways in patient livers
Source: Royal Society of Chemistry journal article supplement (doi:10.1039/c5mb00736d), 2015-11-26
Supplement: c5mb00736d3.xlsx [file c5mb00736d3.xlsx]

## Sheet: Table 1S
Table 1S. Identification by MSMS analysis
# spot	# peptide	# distinct peptide sequence	Peptide sequence	Precursor charge	mass/charge	Score	% Coverage	GENE NAME
528	5	5	ETLMDLSTK.A + Oxidation (M)	2	527.36	20	5	CPS1
			VPAIYGVDTR.M	2	545.74	27
			VLGTSVESIMATEDR.Q + Oxidation (M)	2	812.64	109
			TVLMNPNIASVQTNEVGLK.Q + Oxidation (M)	2	1022.63	50
			IEFEGQPVDFVDPNKQNLIAEVSTK.D	2	939.64	27
581	21	14	K.DSAHGFLK	2	437.78	24	17	TF
			K.YLGEEYVK.A	2	500.81	27
			K.DSGFQFNQLR.G	2	606.28	22
			K.DSGFQMNQLR.G + Oxidation (M)	2	606.34	33
			K.DSGFQMNQLR.G + Oxidation (M)	2	606.39	39
			K.DSGFQYNQLR.G	2	614.33	48
			K.HSTIFENLANK.A	2	637.4	36
			K.HSTIFENLANK.A	3	425.31	43
			K.EFQLFSSPHGK.D	2	638.86	35
			K.EFQLFSSPHGK.D	3	426.25	25
			K.EGYYGYTGAFR.C	2	642.34	33
			K.KDSGFQMNQLR.G + Oxidation (M)	2	670.29	39
			K.SVIPSDGPSVACVK.K	2	708.33	38
			K.SKEFQLFSSPHGK.D	3	498.01	33
			K.MYLGYEYVTAIR.N + Oxidation (M)	2	747.95	75
			K.YYLGYEYVTAIR.N	2	755.88	67
			K.YYLGYEYVTAIR.N	2	755.95	14
			R.FDEFFSEGCAPGSK.K	2	789.47	24
			K.EDPQTFYYAVAVVK.K	2	815.43	45
			K.EDPQTFYYAVAVVK.K	2	815.43	48
			K.EDPQTFYYAVAVVK.K	3	544.02	47
			R.YESSALPSGQLTSLSEYASR.M	3	716.21	31
628	4	3	K.SYLNMDAIMEAIKK.T + Oxidation (M)	2	821.72	5	6	PCCA
			K.VVEEAPSIFLDAETR.R	2	838.68	34
			R.EAGGNMSIQFLGTVYK.V + Oxidation (M)	2	866.07	37
			R.EAGGNMSIQFLGTVYK.V + Oxidation (M)	2	866.08	46
661	6	6	R.LVVPELSSR.G	2	500.39	28	13	CCDC22
			R.ILEIVGNIR.K	2	513.89	51
			R.SIEEVEADMK.T + Oxidation (M)	2	583.78	51
			R.AVELLPDGTANLAK.L	2	706.47	24
			R.LPTDASEDADQPAGDSAILLR.A	2	1078.08	73
			R.EFQASPLLLPVPTQVPQPVGR.V	3	758.47	16
851	9	8	K.ELIPEATEK.Y	2	515.32	22	17	CES1
			K.ELIPEATEK.Y	2	515.34	16
			K.FLSLDLQGDPR.E	2	630.89	42
			K.TEEELLETTLK.M	2	653.44	53
			K.AGQLLSELFTNR.K	2	674.86	44
			R.AISESGVALTSVLVK.K	2	737.53	77
			R.NFHTVPYMVGINK.Q + Oxidation (M)	3	512.59	8
			R.QKTEEELLETTLK.M	3	521.3	6
			K.EGYLQIGANTQAAQK.L	2	796.37	48
851	8	7	K.AIEAALAAR.K	2	443.34	46	15	ALDH4A1
			K.AIEAALAAR.K	2	443.36	60
			R.SAFEYGGQK.C	2	493.82	21
			R.SSPSLTILAGGK.C	2	565.91	43
			R.NAAGNFYINDK.S	2	613.78	21
			R.SADVESVVSGTLR.S	2	660.46	36
			K.STGSIVGQQPFGGAR.A	2	731.46	14
			K.VANEPVLAFTQGSPER.D	2	857.96	60
1043	22	15	K.YNLGLDLR.T	2	482.37	55	32	GLUD2
			K.ALASLMTYK.C + Oxidation (M)	2	507.25	33
			K.ALASLMTYK.C + Oxidation (M)	2	507.29	38
			K.MVEGFFDR.G + Oxidation (M)	2	508.83	33
			K.NLNHVSYGR.L	2	530.31	26
			R.TAAYVNAIEK.V	2	540.29	37
			R.TAAYVNAIEK.V	2	540.31	50
			K.VYNEAGVTFT.-	2	550.83	52
			K.VYNEAGVTFT.-	2	550.84	36
			K.NYTDNELEK.I	2	563.35	29
			K.DIVHSGLAYTMER.S + Oxidation (M)	3	503.27	25
			R.GASIVEDKLVEDLR.T	3	515.31	27
			K.IIAEGANGPTTPEADK.I	2	792.39	44
			K.IIAEGANGPTTPEADK.I	2	792.39	31
			K.HGGTIPIVPTAEFQDR.I	2	869.3	26
			K.HGGTIPIVPTAEFQDR.I	3	580.08	45
			-.SEAVADREDDPNFFK.M	2	870.35	11
			-.SEAVADREDDPNFFK.M	3	580.74	45
			K.GFIGPGIDVPAPDMSTGER.E + Oxidation (M)	2	966.47	19
			K.GFIGPGIDVPAPDMSTGER.E + Oxidation (M)	3	644.71	31
			K.KGFIGPGIDVPAPDMSTGER.E + Oxidation (M)	3	687.37	39
			K.IIAEGANGPTTPEADKIFLER.N	3	748.15	45
1043	6	6	R.GGIVDEGALLR.A	2	550.41	75	14	PHGDH
			K.VTADVINAAEK.L	2	565.85	72
			K.ILQDGGLQVVEK.Q	2	649.93	60
			K.GTIQVITQGTSLK.N	2	673.47	53
			R.AGTGVDNVDLEAATR.K	2	744.9	48
			K.VLISDSLDPCCRK.I	3	521.68	11
1247	26	17	K.INELTGIK.E	2	444.28	43	39	PSMC2
			K.INELTGIK.E	2	444.3	30
			R.ELFEMAR.T + Oxidation (M)	2	456.28	21
			R.ELFEMAR.T + Oxidation (M)	2	456.28	21
			K.DFLEAVNK.V	2	468.34	29
			R.VIGSELVQK.Y	2	486.81	13
			R.VIGSELVQK.Y	2	486.84	34
			R.VIGSELVQK.Y	2	486.85	54
			R.FVNLGIEPPK.G	2	557.37	33
			R.FVNLGIEPPK.G	2	557.38	42
			K.GVLLFGPPGTGK.T	2	571.91	24
			R.ALDEGDIALLK.T	2	579.44	68
			K.IEFSLPDLEGR.T	2	638.36	55
			R.FDDGAGGDNEVQR.T	2	690.36	85
			R.KIEFSLPDLEGR.T	2	702.46	51
			R.KIEFSLPDLEGR.T	3	468.65	23
			R.EVVETPLLHPER.F	3	473.6	24
			K.IATEKDFLEAVNK.V	2	739.45	34
			K.IATEKDFLEAVNK.V	3	493.33	45
			K.QTLQSEQPLQVAR.C	2	749.47	42
			R.TMLELINQLDGFDPR.G + Oxidation (M)	2	889.51	57
			K.IINADSEDPKYIINVK.Q	3	611.43	44
			K.FVVDLSDQVAPTDIEEGMR.V + Oxidation (M)	2	1069.05	43
			K.FVVDLSDQVAPTDIEEGMR.V + Oxidation (M)	3	713.05	3
			K.FVVDLSDQVAPTDIEEGMR.V + Oxidation (M)	3	713.1	47
			R.FVNLGIEPPKGVLLFGPPGTGK.T	3	746.53	29
1247	8	8	K.LSDGVAVLK.V	2	451.35	15	20	HSPD1
			K.VGLQVVAVK.A	2	456.87	38
			R.VTDALNATR.A	2	480.79	63
			R.GVMLAVDAVIAELKK.Q + Oxidation (M)	3	525.04	6
			K.VGEVIVTKDDAMLLK.G + Oxidation (M)	3	549.65	48
			K.TLNDELEIIEGMKFDR.G + Oxidation (M)	3	646.97	31
			R.ALMLQGVDLLADAVAVTMGPK.G + Oxidation (M)	3	710.47	7
			K.LVQDVANNTNEEAGDGTTTATVLAR.S	3	854.12	42
1247	5	5	R.LFVGSIPK.S	2	430.83	17	9	SYNCRIP
			R.LMMDPLTGLNR.G + 2 Oxidation (M)	2	646.9	42
			R.TGYTLDVTTGQR.K	2	656.39	33
			R.NLANTVTEEILEK.A	2	737.44	86
			R.DLFEDELVPLFEK.A	2	797.43	16
1247	7	4	R.TSTADYAMFK.V + Oxidation (M)	2	575.79	37	13	FGG
			R.TSTADYAMFK.V + Oxidation (M)	2	575.81	35
			K.YEASILTHDSSIR.Y	3	497.97	21
			R.YLQEIYNSNNQK.I	2	757.4	38
			R.YLQEIYNSNNQK.I	2	757.4	52
			R.YLQEIYNSNNQK.I	3	505.31	4
			K.AIQLTYNPDESSKPNMIDAATLK.S + Oxidation (M)	3	846.18	51
2122	3	3	R.FQLVDSR.S	2	432.77	43	12	TST
			K.TYEQVLENLESKR.F	2	805.05	58
			R.GAVNMPFMDFLTEDGFEK.G + 2 Oxidation (M)	2	1040.57	35
2167	16	16	K.ITFQESK.T	2	426.79	29	37	NIT2
			K.YFPEYAEK.T	2	523.8	18
			R.SDLYAVEMKKP.- + Oxidation (M)	3	432.93	25
			R.SDLYAVEMKKP.- + Oxidation (M)	3	432.96	23
			R.SDLYAVEMKKP.- + Oxidation (M)	3	432.96	19
			R.FAELAQIYAQR.G	2	655.41	53
			R.AVDNQVYVATASPAR.D	2	781.37	55
			R.AVDNQVYVATASPAR.D	2	781.38	68
			K.AGTEEAIVYSDIDLK.K	2	812.43	67
			K.AGTEEAIVYSDIDLK.K	2	812.43	63
			K.AGTEEAIVYSDIDLK.L	2	876.48	47
			K.YFPEYAEKIPGESTQK.L	3	629.68	16
			R.AVDNQVYVATASPARDDK.A	3	640.72	15
			R.AVDNQVYVATASPARDDK.A	3	640.72	30
			R.AVDNQVYVATASPARDDK.A	3	640.75	35
			R.AVDNQVYVATASPARDDK.A	3	640.75	16
2174	7	5	K.SVQATTENKELK.T	2	674.52	47	17	ECH1
			K.MMADEALGSGLVSR.V + 2 Oxidation (M)	2	734.96	44
			K.MMADEALGSGLVSR.V + 2 Oxidation (M)	2	735.01	88
			K.EVDVGLAADVGTLQR.L	2	772.09	68
			R.KMMADEALGSGLVSR.V + 2 Oxidation (M)	2	799.02	65
			R.KMMADEALGSGLVSR.V + 2 Oxidation (M)	3	533.07	47
			K.VIGNQSLVNELAFTAR.K	2	866.68	68
2185	8	5	K.SPDTFVR.T	2	411.26	28	23	ETFA
			K.SPDTFVR.T	2	411.29	21
			K.LEVAPISDIIAIK.S	2	691.42	46
			R.GTSFDAAATSGGSASSEK.A	2	815.91	88
			R.GTSFDAAATSGGSASSEK.A	2	815.97	50
			K.GLLPEELTPLILATQK.Q	2	868.54	57
			K.GLLPEELTPLILATQK.Q	3	579.44	35
			R.AAVDAGFVPNDMQVGQTGK.I + Oxidation (M)	3	641.06	35
2185	4	2	K.DVLSVAFSSDNR.Q	2	655.37	60	8	GNB2L1
			K.DVLSVAFSSDNR.Q	2	655.38	52
			K.IIVDELKQEVISTSSK.A	2	895.06	71
			K.IIVDELKQEVISTSSK.A	3	597.08	44
2536	11	5	R.EAVEAAVK.E	2	408.8	26	20	NNMT
			R.EAVEAAVK.E	2	408.81	21
			K.FSSLPLGR.E	2	438.79	27
			K.FSSLPLGR.E	2	438.79	21
			R.HSAESQILK.H	2	506.77	24
			R.HSAESQILK.H	2	506.78	28
			K.SSYYMIGEQK.F + Oxidation (M)	2	611.31	54
			K.SSYYMIGEQK.F + Oxidation (M)	2	611.33	51
			K.SSYYMIGEQK.F + Oxidation (M)	2	611.33	38
			K.SSYYMIGEQK.F + Oxidation (M)	2	611.38	21
			R.NLGSLLKPGGFLVIMDALK.S + Oxidation (M)	3	668.2	32
2681	3	3	K.SNVSDAVAQSTR.I	2	618.04	77	12	TPI1
			R.IIYGGSVTGATCK.E	2	664.03	45
			R.GWLKSNVSDAVAQSTR.I	2	860.08	32
2951	4	4	K.VLTPTQVK.N	2	443.32	13	26	PEBP1
			K.LYEQLSGK.-	2	469.34	32
			K.LYTLVLTDPDAPSR.K	2	780.99	54
			K.GNDISSGTVLSDYVGSGPPK.G	2	975.24	107
3321	1	1	K.NPANPVQR.I	1	895.49	45	2	HP
