# Supplementary figures and images for: The proteome of methylmalonic acidemia (MMA): the elucidation of altered pathways in patient livers
Source: Royal Society of Chemistry journal article supplement (doi:10.1039/c5mb00736d), 2015-11-26

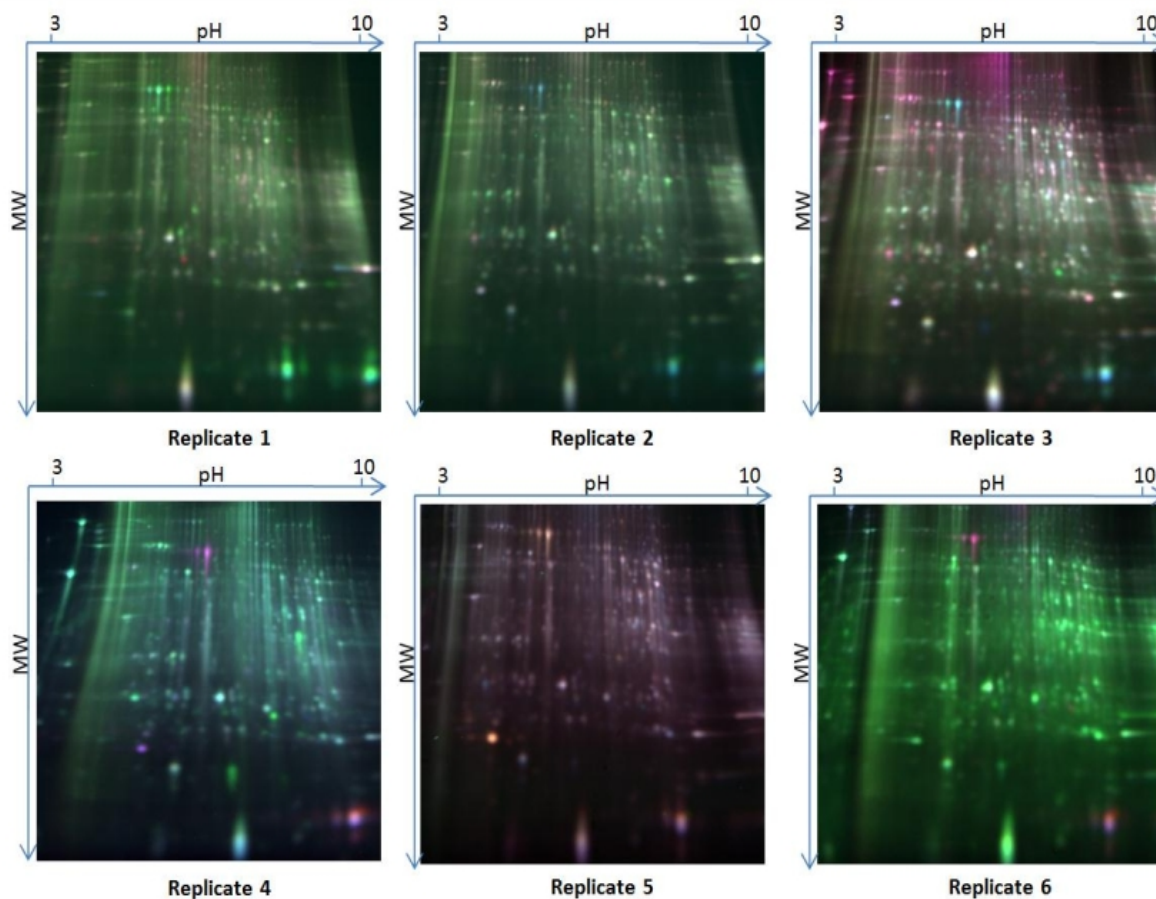

Figure 1 Supplemental material

Supplement: c5mb00736d1.pdf [file c5mb00736d1.pdf]
